# Supplementary material for: Honeybee Cognition as a Tool for Scientific Engagement
Source: MDPI journal article supplement (doi:10.3390/insects12090842), 2021-09-18
Supplement: s1 [file s1]

## Article

# Honeybee Cognition as a Tool for Scientific Engagement

Jai A. Denton <sup>1,2</sup>, Ivan Koludarov <sup>3</sup>, Michele Thompson <sup>4</sup>, Jarosław Bryk <sup>5</sup> & Mariana Velasque <sup>1,\*</sup>

<sup>1</sup> Genomics & Regulatory Systems Unit, Okinawa Institute of Science & Technology, Tancha, Okinawa, Japan

<sup>2</sup> Institute of Vector-borne Disease, Monash University, Clayton, Victoria, Australia

<sup>3</sup> Animal Venomics Group, Justus Liebig University, Giessen, Hessen, Germany

<sup>4</sup> Independent Researcher, Dexter, Michigan USA

<sup>5</sup> School of Applied Sciences, University of Huddersfield, Huddersfield, UK

\* Correspondence: mariana.velasque@oist.jp

## Supplementary Data.

**Table S1.** Number of trainings trails until individual honeybees associated the lemon scent with a sugary reward.

| Group ID. | Replicate. | Control. | Dopamine. | Caffeine.. |
|-----------|------------|----------|-----------|------------|
| 1.        | 1.         | 4.       | 6.        | 4..        |
| 1.        | 2.         | 8.       | 5.        | 5..        |
| 1.        | 3.         | 6.       | 6.        | NA..       |
| 2.        | 1.         | 4.       | 5.        | 5..        |
| 2.        | 2.         | NA.      | 5.        | 5..        |
| 2.        | 3.         | NA.      | 5.        | 7..        |
| 3.        | 1.         | 6.       | 4.        | 4..        |
| 3.        | 2.         | 8.       | 6.        | NA..       |
| 3.        | 3.         | 5.       | 8.        | NA..       |
| 4.        | 1.         | NA.      | NA.       | 4..        |
| 4.        | 2.         | 5.       | 6.        | 6..        |
| 4.        | 3.         | NA.      | 8.        | 5..        |
| 5.        | 1.         | 6.       | NA.       | 6..        |
| 5.        | 2.         | 4.       | 5.        | 4..        |
| 5.        | 3.         | 5.       | 4.        | 5..        |
| 6.        | 1.         | 4.       | 4.        | NA..       |
| 6.        | 2.         | NA.      | 4.        | 5..        |
| 6.        | 3.         | NA.      | NA.       | 4..        |
| 7.        | 1.         | 5.       | 7.        | NA..       |
| 7.        | 2.         | 6.       | 6.        | 4..        |

|     |    |     |     |      |
|-----|----|-----|-----|------|
| 7.  | 3. | 4.  | NA. | 6..  |
| 8.  | 1. | 7.  | 8.  | 4..  |
| 8.  | 2. | 7.  | 6.  | NA.. |
| 8.  | 3. | 5.  | NA. | 4..  |
| 9.  | 1. | 5.  | 5.  | 5..  |
| 9.  | 2. | 4.  | 6.  | 7..  |
| 9.  | 3. | 5.  | 4.  | 5..  |
| 10. | 1. | 6.  | 7.  | NA.. |
| 10. | 2. | NA. | 4.  | 5..  |
| 10. | 3. | NA. | 7.  | 7..  |
| 11. | 1. | 5.  | 6.  | 4..  |
| 11. | 2. | 6.  | 8.  | 6..  |
| 11. | 3. | 4.  | 6.  | NA.. |
| 12. | 1. | 4.  | 7.  | 5..  |
| 12. | 2. | NA. | 7.  | 5..  |
| 12. | 3. | 4.  | 5.  | 4..  |
